# Supplementary material for: circ_0000567/miR-421/TMEM100 Axis Promotes the Migration and Invasion of Lung Adenocarcinoma and Is Associated with Prognosis
Source: PubMed Central journal article supplement (PMC8965118; doi:10.7150/jca.60124), 2022-02-28

## Supplementary Materials

**Table S1 Primers**

| <b>Name</b>            | <b>Primers (5'→3')</b>          |
|------------------------|---------------------------------|
| <b>U6</b>              | Forward CTCGCTTCGGCAGCACA       |
|                        | Reverse AACGCTTCACGAATTTGCGT    |
| <b>Hsa-miR-421</b>     | Forward ATCAACAGACATTAATTGGGCGC |
|                        | Reverse GCGAGCACAGAATTAATACGAC  |
| <b>GAPDH</b>           | Forward ACTCCTCCACCTTTGACGC     |
|                        | Reverse GCTGTAGCCAAATTCGTTGTC   |
| <b>Circ_0000567</b>    | Forward TGAAGAAGATGAAGTTCGGTAT  |
|                        | Reverse GTGCCAGATTTCTGAGTTTT    |
| <b>β-actin</b>         | Forward AGAGCTACGAGCTGCCTGAC    |
|                        | Reverse AGCACTGTGTTGGCGTACAG    |
| <b>TMEM100</b>         | Forward CATGGCAGCGACGATGGAGAAG  |
|                        | Reverse CCGGCGATGAAGACAACCACAG  |
| <b>hsa-miR-873-5p</b>  | Forward GCAGGAACCTGTGAGTCTCCT   |
|                        | Reverse GCGAGCACAGAATTAATACGAC  |
| <b>hsa-miR-3940-3p</b> | Forward CAGCCCGGATCCCAGCCCACTT  |
|                        | Reverse GCGAGCACAGAATTAATACGAC  |
| <b>hsa-miR-550a-3p</b> | Forward TGTCTTACTCCCTCAGGCACAT  |
|                        | Reverse GCGAGCACAGAATTAATACGAC  |
| <b>hsa-miR-1293</b>    | Forward TGGGTGGTCTGGAGATTTGTGC  |
|                        | Reverse GCGAGCACAGAATTAATACGAC  |
| <b>hsa-miR-212</b>     | Forward ACCTTGCTCTAGACTGCTTACT  |
|                        | Reverse GCGAGCACAGAATTAATACGAC  |

- 1 **Figure S1** K-M analyses using the KM plotter website (<http://kmplot.com/analysis/>) of 504 LUAD
- 2 patients. **A-F** Patients with higher expression levels of miR-3940, miR-873, miR-550a-2, miR-1293,
- 3 miR-421 and miR-212 had a shorter OS than those with lower expression levels of these miRNAs.

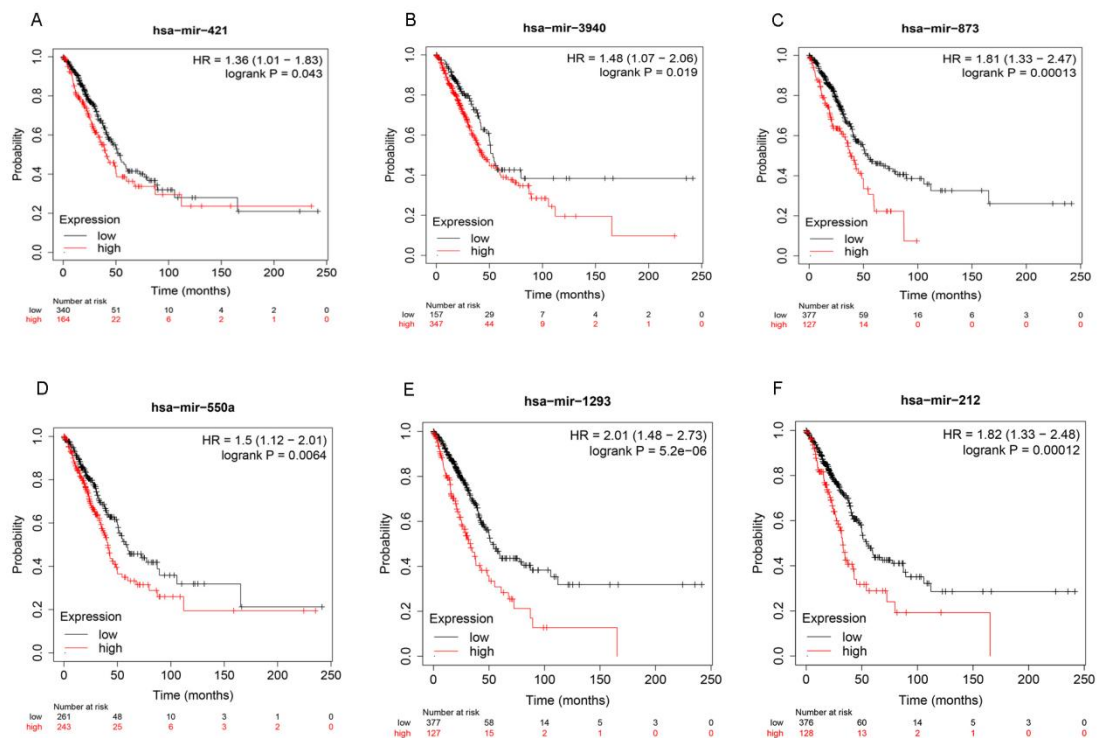

4

5

6 **Figure S2** The relative expression levels of 6 miRNAs according to the TCGA datasets.

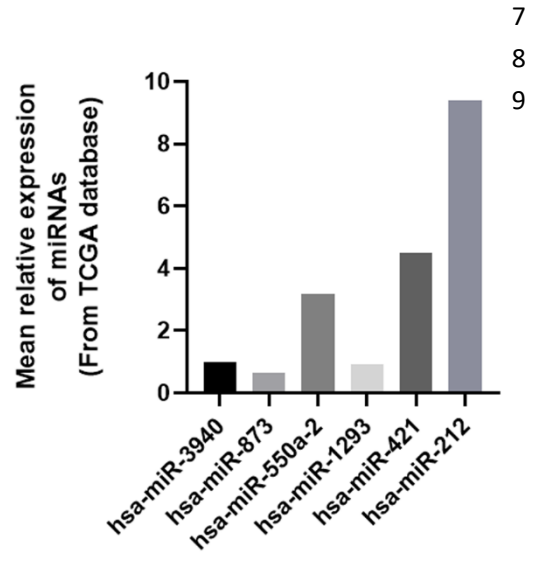

Supplement: jcav13p1540s1.pdf [file jcav13p1540s1.pdf]
